# Supplementary material for: Racial-Ethnic Differences in Incident Olanzapine Use After an FDA Advisory for Patients With Schizophrenia
Source: Atypon-hosted journal article supplement (doi:10.1176/appi.ps.201200002), 2013-01-01
Supplement: 83_ds001.pdf [file 83_ds001.pdf]

ONLINE SUPPLEMENTAL TABLES AND FIGURES

Proportion of Incident Second Generation Antipsychotic Users Receiving Olanzapine over Time, by Race / Ethnicity

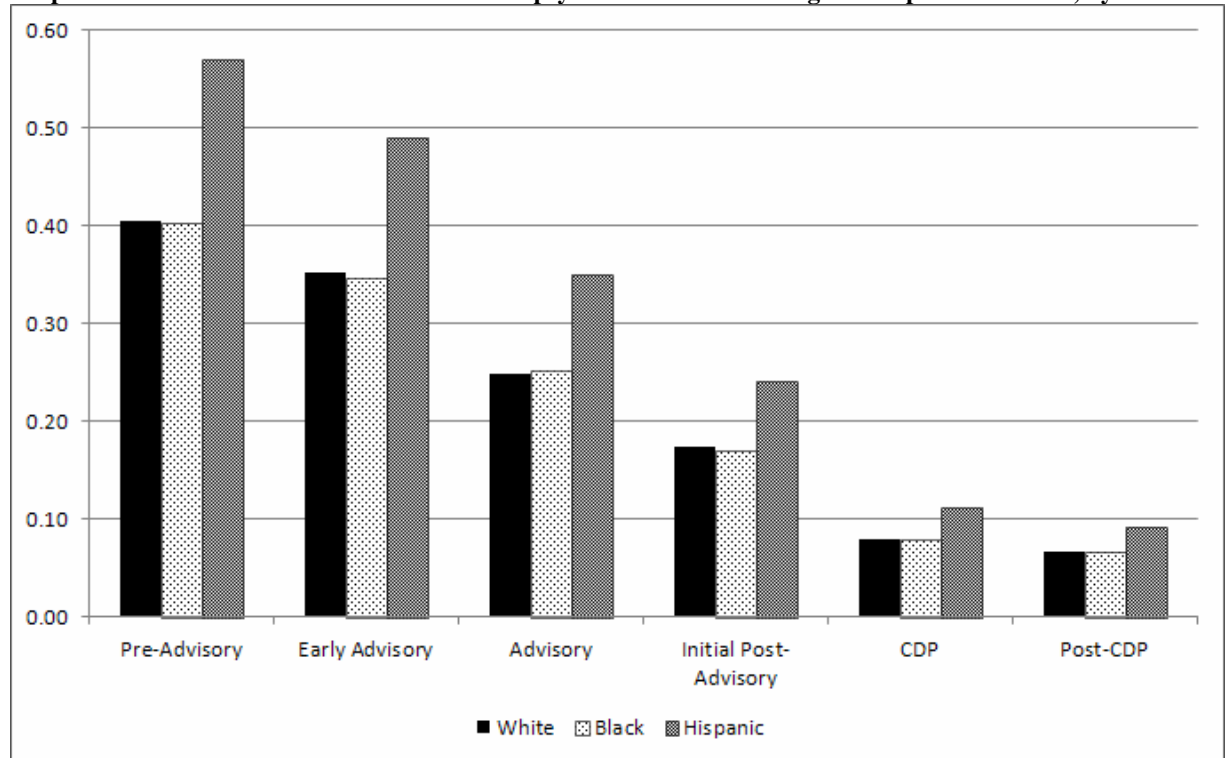

Represents the probability of olanzapine use among second generation antipsychotic users after adjusting for health care need rank-and-replace method.

CDP = Period including the Medicaid Preferred-Drug List policy change, publication of the CATIE trial results, and the FDA mortality among elderly patients with dementia.

**eTable 1 – Timeframes for Assessment**

| <b>Period</b>                 | <b>Context and Rationale for Timeframe Selection</b>                                                                                                                                                                                                                                                                                                                                                                                                                                                                                                                                                                                                                                                                                                                                                                                                                                                                                                                                                                                                                                                                                                                                                                                                                                                                                                                                                                                                                                                                                                                                                                                                                                                                                                                         |
|-------------------------------|------------------------------------------------------------------------------------------------------------------------------------------------------------------------------------------------------------------------------------------------------------------------------------------------------------------------------------------------------------------------------------------------------------------------------------------------------------------------------------------------------------------------------------------------------------------------------------------------------------------------------------------------------------------------------------------------------------------------------------------------------------------------------------------------------------------------------------------------------------------------------------------------------------------------------------------------------------------------------------------------------------------------------------------------------------------------------------------------------------------------------------------------------------------------------------------------------------------------------------------------------------------------------------------------------------------------------------------------------------------------------------------------------------------------------------------------------------------------------------------------------------------------------------------------------------------------------------------------------------------------------------------------------------------------------------------------------------------------------------------------------------------------------|
| January 2001- January 2003    | Period prior to publication of metabolic risk information.                                                                                                                                                                                                                                                                                                                                                                                                                                                                                                                                                                                                                                                                                                                                                                                                                                                                                                                                                                                                                                                                                                                                                                                                                                                                                                                                                                                                                                                                                                                                                                                                                                                                                                                   |
| February 2003 – November 2003 | Period in which peer reviewed publications and media reports began to identify potential metabolic concerns for second generation antipsychotic agents, but prior to the release of the FDA advisory.                                                                                                                                                                                                                                                                                                                                                                                                                                                                                                                                                                                                                                                                                                                                                                                                                                                                                                                                                                                                                                                                                                                                                                                                                                                                                                                                                                                                                                                                                                                                                                        |
| December 2003 – August 2004   | Period beginning with the FDA’s advisory and the professional societies’ consensus statement publication and ending after all manufacturers had complied with the FDA’s request to send “Dear Health Care Provider” letters.                                                                                                                                                                                                                                                                                                                                                                                                                                                                                                                                                                                                                                                                                                                                                                                                                                                                                                                                                                                                                                                                                                                                                                                                                                                                                                                                                                                                                                                                                                                                                 |
| September 2004 – March 2005   | Period following the FDA’s advisory during which no additional changes were identified in the second generation antipsychotic marketplace.                                                                                                                                                                                                                                                                                                                                                                                                                                                                                                                                                                                                                                                                                                                                                                                                                                                                                                                                                                                                                                                                                                                                                                                                                                                                                                                                                                                                                                                                                                                                                                                                                                   |
| April 2005 – September 2005   | Period in which the FDA issued a class-wide black-box warning (April, 2005), the publication of the Clinical Antipsychotic Trials of Intervention Effectiveness (CATIE) results (September, 2005) and the temporary implementation of a preferred drug list in Florida Medicaid (July, 2005). The FDA’s black-box warning regarding mortality risk among elderly patients with dementia has been shown to have spillover effects on second generation antipsychotic use for non-elderly patients with FDA-approved indications and may decrease overall second generation antipsychotic use in our sample. Next, results from the CATIE trial suggested that, for patients with schizophrenia, olanzapine was the most effective antipsychotic agent studied in terms of discontinuation rates, but was associated with greater weight gain and increases in measures of glucose and lipid metabolism. Further, the CATIE trial results suggested that the first generation antipsychotic, perphenazine, was similar to second generation antipsychotics on measured outcomes. These results could potentially lead to an increase in olanzapine use, or an increase in use of first generation antipsychotic agents. Finally, Florida Medicaid announced that, effective July 11, 2005, olanzapine would be reclassified as a non-preferred drug. Per the policy, physicians were given 60 days to switch patients from olanzapine to another agent. However, this policy change was rescinded just prior to the 60 day transition deadline (September 9, 2005) and olanzapine was once again added to the preferred drug list. This policy was previously shown to be effective at reducing the use of olanzapine in Florida Medicaid patients with severe mental illness. |
| October 2005 – December 2006  | Period of relative inactivity in the second generation antipsychotic market that is used to assess more recent changes in use.                                                                                                                                                                                                                                                                                                                                                                                                                                                                                                                                                                                                                                                                                                                                                                                                                                                                                                                                                                                                                                                                                                                                                                                                                                                                                                                                                                                                                                                                                                                                                                                                                                               |

**eTable 2 – Programmatic Definitions of Select Covariates**

| <b>Covariate Description</b>                                    | <b>Programmatic Definition<sup>a</sup></b>                                              |
|-----------------------------------------------------------------|-----------------------------------------------------------------------------------------|
| <b>Medical Conditions Indicating Prior Metabolic Risk</b>       |                                                                                         |
| Diabetes                                                        | CCS codes 49 or 50 AND/OR Prescription for an antidiabetic agent, GPI 27                |
| Dyslipidemia                                                    | CCS codes 53 AND/OR Prescription for a cholesterol-lowering drug, GPI 39                |
| Hypertension                                                    | CCS codes 98 or 99 AND/OR Prescription for an antihypertensive drug, GPI 33, 34, 36, 37 |
| Heart Disease                                                   | CCS codes 100, 101, 103, 104                                                            |
| Obesity                                                         | CCS code 58, ICD-9-CM codes 278.0, 278.00, 278.01, 278.02                               |
| <b>Mental Health Conditions that Impact Treatment Selection</b> |                                                                                         |
| Dementia                                                        | CCS code 653                                                                            |
| Alcohol or Substance Abuse                                      | CCS codes 660, 661                                                                      |
| <b>Medical Conditions that Complicate Treatment</b>             |                                                                                         |
| Thyroid Conditions                                              | CCS code 48                                                                             |
| Renal Conditions                                                | CCS codes 157, 158                                                                      |
| Hepatic Conditions                                              | CCS codes 151                                                                           |
| Pancreatic Conditions                                           | CCS code 152                                                                            |
| Asthma                                                          | CCS code 128                                                                            |
| Anemia                                                          | CCS code 59                                                                             |
| Migraines                                                       | ICD-9-CM 346                                                                            |
| Lupus                                                           | CCS code 210                                                                            |
| Multiple Sclerosis                                              | CCS code 80                                                                             |
| Pregnancy                                                       | CCS codes 180-188, 190-196                                                              |

<sup>a</sup> CCS = Clinical Classifications Software (<http://www.hcup-us.ahrq.gov/toolsoftware/ccs/ccs.jsp>); ICD-9-CM = International Classification of Disease, Ninth Edition Codes; GPI = Generic Product Identifier.

**eTable 3: Characteristics of Incident Second Generation Antipsychotic Users Diagnosed with Schizophrenia, by Race / Ethnicity**

|                                                         | White     |     | Black     |       | Hispanic  |        |
|---------------------------------------------------------|-----------|-----|-----------|-------|-----------|--------|
|                                                         | N = 3,532 |     | N = 2,518 |       | N = 1,851 |        |
|                                                         | N         | %   | N         | %     | N         | %      |
| <b>Age</b>                                              |           |     |           |       |           |        |
| 18 – 29 Years                                           | 648       | 18. | 576       | 23*** | 289       | 16*    |
| 30 – 39 Years                                           | 704       | 20  | 592       | 24*** | 383       | 21     |
| 40 – 49 Years                                           | 1,063     | 30  | 825       | 33**  | 575       | 31     |
| 50 – 59 Years                                           | 833       | 24  | 413       | 16*** | 493       | 27*    |
| 60 – 64 Years                                           | 284       | 8   | 112       | 4***  | 111       | 6**    |
| <b>Sex</b>                                              |           |     |           |       |           |        |
| Male                                                    | 1,697     | 48  | 1,253     | 50    | 762       | 41***  |
| Female                                                  | 1,835     | 52  | 1,265     | 50    | 1,089     | 59     |
| <b>Medicaid Eligibility Category</b>                    |           |     |           |       |           |        |
| SSI                                                     | 2,953     | 84  | 2,235     | 89*** | 1,492     | 81**   |
| Other                                                   | 579       | 16  | 283       | 11    | 359       | 19     |
| <b>Received Care from a Psychiatrist</b>                |           |     |           |       |           |        |
| Yes                                                     | 2,273     | 64  | 1,685     | 67*   | 1,376     | 74***  |
| No                                                      | 1,259     | 36  | 833       | 33    | 475       | 26     |
| <b>Disease Severity</b>                                 |           |     |           |       |           |        |
| Any Inpatient Mental Health Visits                      | 1,049     | 30  | 879       | 35*** | 388       | 21***  |
| <b>Prior Mental Health Diagnoses</b>                    |           |     |           |       |           |        |
| Alcohol and/or Substance Abuse                          | 408       | 12  | 363       | 14*** | 109       | 6.0*** |
| <b>Diagnoses that Modify Treatment</b>                  |           |     |           |       |           |        |
| Dementia                                                | 68        | 2   | 43        | 2     | 22        | 1*     |
| Complicating Conditions                                 | 695       | 20  | 511       | 20    | 395       | 21     |
| <b>Metabolic-Related Conditions</b>                     |           |     |           |       |           |        |
| Any Prior Metabolic Risk Factor                         | 1,400     | 40  | 1,001     | 40    | 860       | 47***  |
| Diabetes                                                | 399       | 11  | 321       | 13    | 277       | 15***  |
| Hyperlipidemia                                          | 495       | 14  | 218       | 9***  | 367       | 20***  |
| Hypertension                                            | 981       | 28  | 808       | 32*** | 611       | 33***  |
| Heart Disease                                           | 254       | 7   | 136       | 5**   | 167       | 9**    |
| Obesity                                                 | 86        | 2   | 76        | 3     | 32        | 2      |
| <b>Index Prescription Fill Period</b>                   |           |     |           |       |           |        |
| Pre-Advisory Period (Jan 2001 – Jan 2003)               | 1,985     | 56  | 1,361     | 54    | 985       | 53*    |
| Early- Advisory (Feb 2003 - Nov 2003)                   | 640       | 18  | 482       | 19    | 344       | 19     |
| Advisory Period (Dec 2003 - Aug 2004)                   | 428       | 12  | 282       | 11    | 229       | 12     |
| Initial Post-Advisory (Sept 2004 - Mar 2005)            | 223       | 6   | 189       | 8     | 134       | 7      |
| PDL / CATIE / Dementia Warning (April 2005 - Sept 2005) | 152       | 4   | 123       | 5     | 95        | 5      |
| Post-PDL/CATIE / Dementia Warning (Oct 2005 - Dec 2006) | 104       | 3   | 81        | 3     | 64        | 3      |
| <b>Florida Medicaid District</b>                        |           |     |           |       |           |        |
| District 1                                              | 184       | 5   | 116       | 5     | 5         | 0      |
| District 2                                              | 180       | 5   | 176       | 7     | 1         | 0      |
| District 3                                              | 401       | 11  | 209       | 8     | 22        | 1      |
| District 4                                              | 412       | 12  | 353       | 14    | 25        | 1      |

|             |     |    |     |    |       |    |
|-------------|-----|----|-----|----|-------|----|
| District 5  | 402 | 11 | 116 | 5  | 17    | 1  |
| District 6  | 262 | 7  | 140 | 6  | 40    | 2  |
| District 7  | 197 | 6  | 146 | 6  | 46    | 2  |
| District 8  | 166 | 5  | 33  | 1  | 23    | 1  |
| District 9  | 254 | 7  | 231 | 9  | 37    | 2  |
| District 10 | 355 | 10 | 300 | 12 | 60    | 3  |
| District 11 | 719 | 20 | 698 | 28 | 1,575 | 85 |

---

\* p-value < 0.05; \*\* p-value < 0.01, \*\*\* p-value < 0.001

Incident users are enrollees who have no second generation antipsychotic use in the 180 days prior to their first observed fill date.

Comparisons are between black vs. white and Hispanic vs white.
